# Supplementary material for: Specific ion effects induced by mono-valent salts in like charged aggregates in water
Source: Royal Society of Chemistry journal article supplement (doi:10.1039/c3sm52925h), 2014-01-01
Supplement: c3sm52925h1.pdf [file c3sm52925h1.pdf]

## Electronic Supplementary Information

### Specific ion effects induced by mono-valent salts in like-charged aggregates in water

Ningdong Huang<sup>a</sup>, Jiaojiao Tao<sup>a</sup>, Jun Liu<sup>b</sup>, Shenghui Wei<sup>a</sup>, Liangbin Li<sup>\*ac</sup>, Ziyu Wu<sup>\*a</sup>

<sup>a</sup> National Synchrotron Radiation Lab, College of Nuclear Science and Technology, University of Science and Technology of China, Hefei, China. Email:

lbli@ustc.edu.cn, wuzy@ustc.edu.cn

<sup>b</sup> Beijing Synchrotron Radiation Facility, Institute of High Energy Physic, Chinese Academy of Sciences, O. Box 918, 100049 Beijing, China

<sup>c</sup> Department of Polymer Science and Engineering, CAS Key Lab of Soft Matter Chemistry, University of Science and Technology of China, Hefei, China

### Experimental Methods:

Small angle X-ray scattering (SAXS) measurements were carried out at the beamline (BL16B1) of Shanghai Synchrotron Radiation Facility. The X-ray wavelength was 0.124 nm, and a Mar165 CCD detector (2048 × 2048 pixels with pixel size 80 μm) was employed to collect two-dimensional (2D) SAXS patterns. The sample-to-detector distance was 5235 mm and 2125 mm respectively to achieve high resolution or higher order peaks located at larger  $q$  value. Fit2D software from European Synchrotron Radiation Facility was used to analyze SAXS patterns in terms of the scattering vector  $q = (4\pi\sin\theta)/\lambda$ , with  $2\theta$  as the scattering angle and  $\lambda$  as the X-ray wavelength.

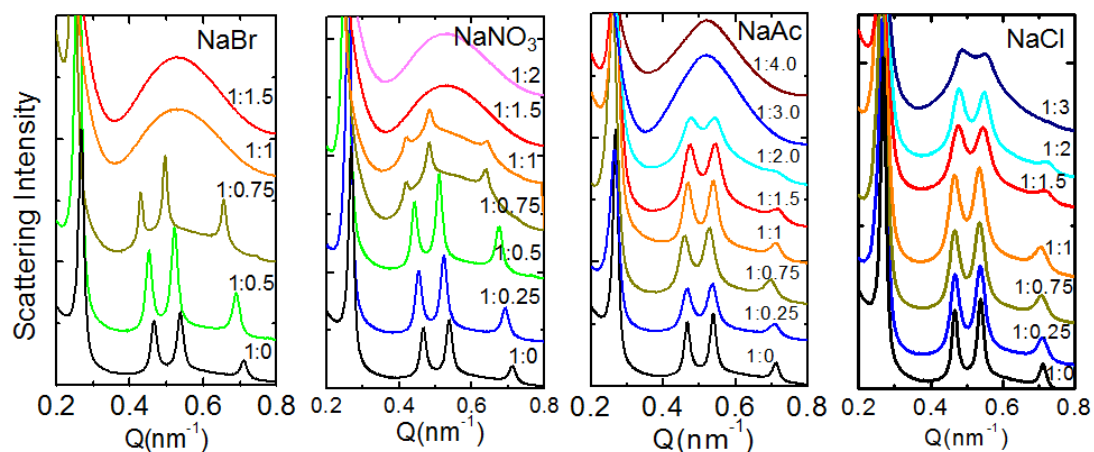

Figure S1 SAXS of 1.5wt%  $P_7COONa_3$  aqueous solution mixed with different salts at varying mole ratio aged for two weeks;

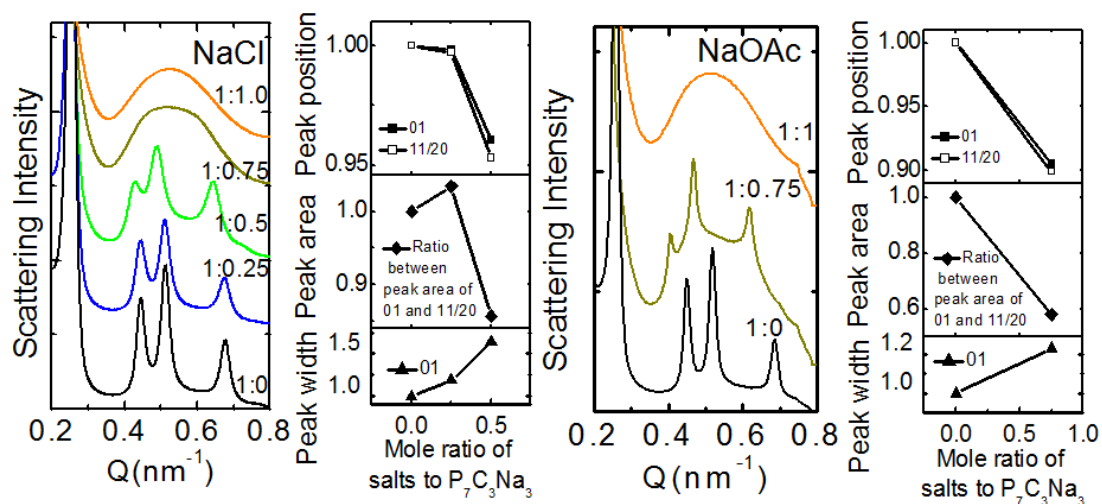

Figure S2 (a) SAXS of 1.5wt%  $P_7COONa_3$  in aqueous solution of NaCl at varying mole ratio aged for four weeks; (b) Parameters of 01 and 11/20 scattering peaks derived from (a) versus mole ratio of NaCl to  $P_7COONa_3$ ; (c) and (d) SAXS and fitting parameters of mixture with NaOAc aged for four weeks.

Table S1 Classification of salts and summary of behavior for some peak parameters derived by fitting SAXS. Numbers colored in red indicate a decrease compared to the original value of pure 1.5wt% P7COONa3 solution, those in blue an increase.

| Classification<br>Properties                | Class I<br>Electrostatic effects |        |                   | Class II<br>Two mechanisms<br>competing |        |       |
|---------------------------------------------|----------------------------------|--------|-------------------|-----------------------------------------|--------|-------|
| Two weeks aging                             | no inflection point              |        |                   | inflection of peak positions            |        |       |
| Salt                                        | NaBr                             | KCl    | NaNO <sub>3</sub> | CsCl                                    | NaOAc  | NaCl  |
| Critical mole ratio: $R_c$                  | 1.0                              | 1.5    | 1.5               | 1.0                                     | 0.75   | 1.0   |
| Scaled peak position<br>variation of (01) % | -7.5~0                           | -10~0  | -10~0             | -5~2.5                                  | -2~2   | -1~1  |
| Scaled peak width<br>variation of (01) %    | -8~0                             | -26~22 | -27~10            | 0~165                                   | 0~170  | 0~156 |
| Four weeks aging                            | no inflection point              |        |                   | no inflection point                     |        |       |
| Critical mole ratio: $R_c$                  | 1.0                              |        |                   | 1.5                                     | 1.0    | 0.75  |
| Scaled peak position<br>variation of (01) % | -8.0~0                           |        |                   | -1.2~0                                  | -9.5~0 | -4~0  |
| Scaled peak width<br>variation of (01) %    | -26~0.3                          |        |                   | 0~84                                    | 0~23   | 0~64  |
